# Supplementary material for: HLH‐30‐dependent rewiring of metabolism during starvation in C. elegans
Source: PubMed Central journal article supplement (PMC8045935; doi:10.1111/acel.13342), 2021-03-16
Supplement: ACEL-20-e13342-s001.pdf [file ACEL-20-e13342-s001.pdf]

## Figures and Tables

| Strain                         | FA treatment      | FA treated survival-span (d) | FA treated survival-span (d)* | No. of treated animals | Control survival-span (d) | Control survival-span (d)* | No. of Control animals | Max survival-span (d) | <i>p</i> -value versus Control |
|--------------------------------|-------------------|------------------------------|-------------------------------|------------------------|---------------------------|----------------------------|------------------------|-----------------------|--------------------------------|
| <b>N2 Bristol (WT)</b>         | C <sub>12:0</sub> | 11<br>(45.4%)                | 10.75<br>(36.5%)              | 93/120                 | 6                         | 6.82                       | 91/120                 | 16/10                 | <0.0001                        |
|                                | C <sub>12:0</sub> | 10<br>(20%)                  | 9.96<br>(26.9%)               | 85/120                 | 8                         | 7.28                       | 93/120                 | 17/10                 | <0.0001                        |
|                                | C <sub>12:0</sub> | 13<br>(53.8%)                | 12.03<br>(49.6%)              | 95/120                 | 6                         | 6.06                       | 93/120                 | 16/10                 | <0.0001                        |
|                                | C <sub>16:0</sub> | 8<br>(25%)                   | 7.74<br>(21.7%)               | 109/120                | 6                         | 6.06                       | 93/120                 | 12/10                 | <0.0001                        |
|                                | C <sub>16:0</sub> | 9<br>(11.1%)                 | 8.53<br>(13.0%)               | 94/120                 | 8                         | 7.42                       | 97/120                 | 12/10                 | <0.0001                        |
|                                | C <sub>16:0</sub> | 9<br>(11.1%)                 | 7.89<br>(5.70%)               | 106/120                | 8                         | 7.44                       | 87/120                 | 12/10                 | 0.0045                         |
| <b>JIN1375 (<i>hlh-30</i>)</b> | C <sub>12:0</sub> | 10<br>(40%)                  | 8.79<br>(37.8%)               | 103/120                | 6                         | 5.46                       | 81/120                 | 15/8                  | <0.0001                        |
|                                | C <sub>12:0</sub> | 9<br>(44.4%)                 | 9.43<br>(46.0%)               | 103/120                | 5                         | 5.09                       | 89/120                 | 16/7                  | <0.0001                        |
|                                | C <sub>12:0</sub> | 13<br>(61.5%)                | 10.78<br>(62.2%)              | 104/120                | 5                         | 4.07                       | 88/120                 | 15/7                  | <0.0001                        |
|                                | C <sub>16:0</sub> | 8<br>(37.5%)                 | 7.43<br>(45.2%)               | 98/120                 | 5                         | 4.07                       | 88/120                 | 9/7                   | <0.0001                        |
|                                | C <sub>16:0</sub> | 8<br>(50%)                   | 7.51<br>(43.6%)               | 98/120                 | 4                         | 4.23                       | 90/120                 | 10/6                  | <0.0001                        |
|                                | C <sub>16:0</sub> | 9<br>(44.4%)                 | 7.29<br>(37.4%)               | 102/120                | 5                         | 4.56                       | 89/120                 | 10/7                  | <0.0001                        |

**Supplementary Table S2. Summary of survival-span statistics.** Median, mean and maximum survival and statistical significance were calculated for each experiment. \*Mean survival lifespan. *p*-values were based on median survival lifespan.

| Strain            | RNAi treatment     | FA treatment      | RNAi / FA treated survival-span (d) | RNAi / FA treated survival-span (d)* | No. of treated animals | Control survival-span (d) | Control survival-span (d)* | No. of Control animals | Max survival-span (d) | p-value versus Control |
|-------------------|--------------------|-------------------|-------------------------------------|--------------------------------------|------------------------|---------------------------|----------------------------|------------------------|-----------------------|------------------------|
| N2 Bristol (WT)   | <i>prx-5</i> (JA)  | none              | 8 (0%)                              | 7 (-3.28%)                           | 89/120                 | 8                         | 7.23                       | 89/120                 | 11/10                 | 0.4624                 |
|                   | <i>prx-5</i> (JA)  | none              | 8 (-12.5%)                          | 7.36 (-2.58%)                        | 88/120                 | 9                         | 7.55                       | 83/120                 | 10/10                 | 0.2838                 |
|                   | <i>prx-5</i> (JA)  | none              | 9 (11.11%)                          | 7 (-1%)                              | 85/120                 | 8                         | 7.07                       | 84/120                 | 10/10                 | 0.7177                 |
|                   | <i>atgl-1</i> (JA) | none              | 6 (-33.32%)                         | 5.21 (-38.77%)                       | 88/120                 | 8                         | 7.23                       | 89/120                 | 8/10                  | <0.0001                |
|                   | <i>atgl-1</i> (JA) | none              | 7 (-28.57%)                         | 6.47 (-16.69%)                       | 88/120                 | 9                         | 7.55                       | 83/120                 | 8/10                  | <0.0001                |
|                   | <i>atgl-1</i> (JA) | none              | 5 (-60%)                            | 4.75 (-48.84%)                       | 84/120                 | 8                         | 7.07                       | 84/120                 | 8/10                  | <0.0001                |
|                   | <i>cpt-1</i> (JA)  | none              | 3 (-166.66%)                        | 3.38 (-106.21%)                      | 83/120                 | 8                         | 6.97                       | 86/120                 | 5/10                  | <0.0001                |
|                   | <i>prx-5</i> (JA)  | C <sub>12:0</sub> | 12 (0%)                             | 9.92 (-6.04%)                        | 88/120                 | 12                        | 10.52                      | 87/120                 | 15/15                 | 0.3020                 |
|                   | <i>prx-5</i> (JA)  | C <sub>12:0</sub> | 12 (8.33%)                          | 10.17 (-3.34%)                       | 84/120                 | 11                        | 10.51                      | 86/120                 | 15/15                 | 0.8463                 |
|                   | <i>prx-5</i> (JA)  | C <sub>12:0</sub> | 10 (-10%)                           | 9.46 (-2.21%)                        | 105/120                | 11                        | 9.67                       | 107/120                | 15/15                 | 0.2236                 |
|                   | <i>atgl-1</i> (JA) | C <sub>12:0</sub> | 11 (-9.09%)                         | 9.57 (-9.92%)                        | 89/120                 | 12                        | 10.52                      | 87/120                 | 15/15                 | 0.1780                 |
|                   | <i>atgl-1</i> (JA) | C <sub>12:0</sub> | 12 (8.33%)                          | 10.59 (0.75%)                        | 88/120                 | 11                        | 10.51                      | 86/120                 | 15/15                 | 0.8616                 |
|                   | <i>atgl-1</i> (JA) | C <sub>12:0</sub> | 12 (8.33%)                          | 9.76 (0.92%)                         | 95/120                 | 11                        | 9.67                       | 107/120                | 15/15                 | 0.9674                 |
|                   | <i>cpt-1</i> (JA)  | C <sub>12:0</sub> | 9 (-11.11%)                         | 8.11 (-14.05%)                       | 102/120                | 10                        | 9.25                       | 98/120                 | 15/15                 | 0.2773                 |
|                   | <i>prx-5</i> (JA)  | C <sub>16:0</sub> | 8.5 (-41.17%)                       | 8.61 (-12.07%)                       | 104/120                | 12                        | 9.65                       | 89/120                 | 14/14                 | 0.0228                 |
|                   | <i>prx-5</i> (JA)  | C <sub>16:0</sub> | 9 (-22.22%)                         | 9.17 (-4.14%)                        | 91/120                 | 11                        | 9.55                       | 85/120                 | 14/14                 | 0.462                  |
|                   | <i>prx-5</i> (JA)  | C <sub>16:0</sub> | 10 (-5%)                            | 9 (-2.77%)                           | 101/120                | 10.5                      | 9.25                       | 110/120                | 14/14                 | 0.3309                 |
|                   | <i>atgl-1</i> (JA) | C <sub>16:0</sub> | 11 (-9.09%)                         | 9.78 (1.32%)                         | 87/120                 | 12                        | 9.65                       | 89/120                 | 14/14                 | 0.5313                 |
|                   | <i>atgl-1</i> (JA) | C <sub>16:0</sub> | 12 (8.33%)                          | 10.18 (6.18%)                        | 89/120                 | 11                        | 9.55                       | 85/120                 | 14/14                 | 0.1805                 |
|                   | <i>atgl-1</i> (JA) | C <sub>16:0</sub> | 11.5 (8.33%)                        | 9.38 (1.38%)                         | 102/120                | 10.5                      | 9.25                       | 110/120                | 14/14                 | 0.6918                 |
| <i>cpt-1</i> (JA) | C <sub>16:0</sub>  | 3 (-200%)         | 5.48 (-53.28%)                      | 104/120                              | 9                      | 8.4                       | 97/120                     | 12/15                  | <0.0001               |                        |

**Supplementary Table S3A. Summary of survival-span statistics for wildtype animals.** Median, mean and maximum survival and statistical significance were calculated for each experiment. \*Mean survival lifespan. *p*-values were based on median survival lifespan.

| Strain                              | RNAi treatment     | FA treatment      | RNAi / FA treated survival-span (d) | RNAi / FA treated survival-span (d)* | No. of treated animals | Control survival-span (d) | Control survival-span (d)* | No. of Control animals | Max survival-span (d) | p-value versus Control |
|-------------------------------------|--------------------|-------------------|-------------------------------------|--------------------------------------|------------------------|---------------------------|----------------------------|------------------------|-----------------------|------------------------|
| <b>JIN1375</b><br>( <i>hlh-30</i> ) | <i>prx-5</i> (JA)  | none              | 3<br>(-33.33%)                      | 3.16<br>(-25.63%)                    | 86/120                 | 4                         | 3.97                       | 85/120                 | 6/6                   | < 0.0001               |
|                                     | <i>prx-5</i> (JA)  | none              | 3<br>(-33.33%)                      | 3.09<br>(-22.33%)                    | 93/120                 | 4                         | 3.78                       | 88/120                 | 5/6                   | < 0.0001               |
|                                     | <i>prx-5</i> (JA)  | none              | 3<br>(-33.33%)                      | 2.98<br>(-25.50%)                    | 84/120                 | 4                         | 3.74                       | 85/120                 | 5/6                   | < 0.0001               |
|                                     | <i>atgl-1</i> (JA) | none              | 4<br>(0%)                           | 3.56<br>(-11.51%)                    | 90/120                 | 4                         | 3.97                       | 85/120                 | 6/6                   | 0.0032                 |
|                                     | <i>atgl-1</i> (JA) | none              | 4<br>(0%)                           | 3.5<br>(-8%)                         | 94/120                 | 4                         | 3.78                       | 88/120                 | 5/6                   | 0.0018                 |
|                                     | <i>atgl-1</i> (JA) | none              | 3<br>(-33.33%)                      | 3.15<br>(-18.73%)                    | 83/120                 | 4                         | 3.74                       | 85/120                 | 5/6                   | 0.0004                 |
|                                     | <i>cpt-1</i> (JA)  | none              | 4<br>(0%)                           | 3.74<br>(3.20%)                      | 87/120                 | 4                         | 3.62                       | 85/120                 | 6/6                   | 0.6441                 |
|                                     | <i>prx-5</i> (JA)  | C <sub>12:0</sub> | 4<br>(75%)                          | 4.06<br>(-88.91%)                    | 87/120                 | 7                         | 7.67                       | 84/120                 | 6/14                  | < 0.0001               |
|                                     | <i>prx-5</i> (JA)  | C <sub>12:0</sub> | 3<br>(-233.33%)                     | 3.3<br>(-173.63%)                    | 86/120                 | 10                        | 9.03                       | 91/120                 | 5/14                  | < 0.0001               |
|                                     | <i>prx-5</i> (JA)  | C <sub>12:0</sub> | 3<br>(-233.33%)                     | 3.1<br>(184.83%)                     | 94/120                 | 10                        | 8.83                       | 112/120                | 5/15                  | < 0.0001               |
|                                     | <i>atgl-1</i> (JA) | C <sub>12:0</sub> | 6<br>(-16.66%)                      | 5.5<br>(-39.45%)                     | 88/120                 | 7                         | 7.67                       | 84/120                 | 10/14                 | < 0.0001               |
|                                     | <i>atgl-1</i> (JA) | C <sub>12:0</sub> | 9<br>(-11.11%)                      | 7.29<br>(-23.86%)                    | 87/120                 | 10                        | 9.03                       | 91/120                 | 10/14                 | < 0.0001               |
|                                     | <i>atgl-1</i> (JA) | C <sub>12:0</sub> | 11.5<br>(13.04%)                    | 9.33<br>(5.35%)                      | 98/120                 | 10                        | 8.83                       | 112/120                | 14/15                 | 0.4269                 |
|                                     | <i>cpt-1</i> (JA)  | C <sub>12:0</sub> | 9<br>(0%)                           | 8.37<br>(0%)                         | 101/120                | 9                         | 8.37                       | 100/120                | 15/15                 | 0.4095                 |
|                                     | <i>prx-5</i> (JA)  | C <sub>16:0</sub> | 4<br>(-75%)                         | 4.33<br>(-51.27%)                    | 100/120                | 7                         | 6.55                       | 90/120                 | 6/10                  | < 0.0001               |
|                                     | <i>prx-5</i> (JA)  | C <sub>16:0</sub> | 3<br>(-200%)                        | 3.19<br>(-118.49%)                   | 84/120                 | 9                         | 6.97                       | 86/120                 | 5/10                  | < 0.0001               |
|                                     | <i>prx-5</i> (JA)  | C <sub>16:0</sub> | 3<br>(-200%)                        | 2.9<br>(-189.31%)                    | 102/120                | 9                         | 8.39                       | 103/120                | 5/12                  | < 0.0001               |
|                                     | <i>atgl-1</i> (JA) | C <sub>16:0</sub> | 6<br>(-16.6%)                       | 6.03<br>(-8.62%)                     | 91/120                 | 7                         | 6.55                       | 90/120                 | 10/11                 | 0.0068                 |
|                                     | <i>atgl-1</i> (JA) | C <sub>16:0</sub> | 9<br>(0%)                           | 7.34<br>(5.04%)                      | 89/120                 | 9                         | 6.97                       | 86/120                 | 10/10                 | 0.4547                 |
|                                     | <i>atgl-1</i> (JA) | C <sub>16:0</sub> | 11<br>(18.18%)                      | 8.48<br>(1.06%)                      | 94/120                 | 9                         | 8.39                       | 103/120                | 13/14                 | 0.1734                 |
| <i>cpt-1</i> (JA)                   | C <sub>16:0</sub>  | 6.5<br>(-7.69%)   | 6.05<br>(-3.63%)                    | 110/120                              | 7                      | 6.27                      | 105/120                    | 10/10                  | 0.0637                |                        |

**Supplementary Table S3B. Summary of survival-span statistics for *hlh-30* mutant animals.**

Median, mean and maximum survival and statistical significance were calculated for each experiment. \*Mean survival lifespan. *p*-values were based on median survival lifespan.
